1 Variations in state-level SARS-COV-2 testing recommendations in the United States,  
2 March-July 2020

3

4 Stephanie R. Perniciaro & Daniel M. Weinberger

5

6 Department of Epidemiology of Microbial Diseases, Yale School of Public Health, New  
7 Haven, CT, United States.

8

9 Abstract

10

11 Background: Testing recommendations for COVID-19 in the United States varied by  
12 state and over time in the spring and summer of 2020.

13 Methods: We compiled data about COVID-19 testing, cases, and deaths, and excess  
14 pneumonia + influenza + COVID-19 deaths to assess relationships between testing  
15 recommendations, *per capita* tests performed, epidemic intensity, and excess mortality  
16 during the early phase of the COVID-19 pandemic in the United States.

17 Results: As of July 2020, 16 states recommended testing asymptomatic members of the  
18 general public. The rate of COVID-19 tests reported in each state correlates with more  
19 inclusive testing recommendations and with higher epidemic intensity. Higher per capita  
20 testing was associated with more complete reporting of COVID-19 deaths, which is a  
21 fundamental requirement for analyzing the pandemic.

22 Conclusions: Reported deaths due to COVID-19 likely represent an undercount of the  
23 true burden of the pandemic. Coordinated, consistent guidelines for COVID-19 testing  
24 should be a high priority for state and national health systems.

25

## 26 Background

27

28 SARS-CoV-2, the virus that causes COVID-19, was declared a global pandemic by the  
29 World Health Organization in March 2020.<sup>1</sup> Worldwide, responses to the pandemic have  
30 varied and had varying success. In the United States, each state determined testing  
31 guidelines, lockdown procedures, and reopening procedures individually.<sup>2</sup> The Centers  
32 for Disease Control and Prevention also maintained testing recommendations and  
33 guidelines, but states and localities were largely responsible for their own policies.<sup>3</sup> The  
34 COVID-19 pandemic in the United States is ongoing, costing around 150,000 lives by  
35 the end of July 2020.<sup>4</sup>

36

37 Testing for COVID-19 has been a continual hurdle in the United States.<sup>5</sup> Supply chain  
38 issues,<sup>6</sup> doubts about testing accuracy and methodology,<sup>7</sup> and conflicting guidance from  
39 federal, state and local officials about testing have all interfered with testing efforts.<sup>8</sup>  
40 State governments and health departments established testing guidelines in March  
41 2020, which were sometimes augmented by local governmental health departments.<sup>9</sup>  
42 The turnaround time for test results has been strained,<sup>10</sup> and resources for individuals to  
43 sustain their household resources while remaining isolated or quarantined while  
44 awaiting the result of a test have not been widely available.<sup>11</sup>

45

46 Here we describe the changing recommendations for COVID-19 testing to the general  
47 public in the United States in the spring and summer of 2020 and the consequences of  
48 these changes for obtaining accurate statistics about the pandemic.

49

50 Methods

51

52 The objective of this analysis was to establish whether varying the state-level COVID-19  
53 testing guidelines had any impact on the actual number of tests performed, and whether  
54 the number of tests performed was related to the rate of recognizing COVID-19 deaths  
55 as a cause of excess mortality (reported COVID-19 deaths/excess pneumonia +  
56 influenza+ COVID-19 (PIC) deaths). COVID-19 testing guidelines were documented  
57 from the websites of the departments of health in each of the 50 states and the District  
58 of Columbia once monthly from March-July 2020 (Supplemental Table 1). We ranked  
59 recommendations to tests by the general public (as opposed to members of specific  
60 named risk groups) by assigning 0= criterion not specified, 1= accessible to people with  
61 a negative influenza test, 2= accessible to people with symptoms consistent with  
62 COVID-19 illness, 3= accessible to anyone, including asymptomatic people.

63

64 Correlations between testing recommendation score, tests per capita, and percentage  
65 of positive tests were analyzed with Spearman correlation tests.

66

67 We used a generalized additive model (negative binomial link) to assess the  
68 completeness of death reporting. The outcome variable was the number of reported  
69 COVID-19 deaths in each state and month. The number of excess PIC deaths was  
70 included as an offset term, so this effectively models the ratio of reported COVID-19  
71 deaths/excess PIC deaths. The *per capita* testing rate in each state and month was  
72 included as a penalized spline. Uncertainty in the estimates of excess PIC deaths were  
73 ignored in these analyses, and excess PIC deaths were constrained to be greater than  
74 or equal to the reported COVID-19 deaths. The model was fit using the package “mgcv”  
75 in R.

76

77 We also evaluated relationships between the number of COVID-19 tests performed per  
78 capita, testing recommendations score, and epidemic intensity (defined as excess PIC  
79 deaths<sup>12</sup> per capita) using a negative binomial regression model. Total COVID-19 tests  
80 performed in each state was the outcome variable, offset by the log of the total  
81 population of each state, with the testing recommendations score (categorical) and the  
82 log of epidemic intensity as the independent variables.

83

84 The number of excess PIC deaths per state and the reported number of COVID-19  
85 deaths were obtained from a repository describing excess deaths during the COVID-19  
86 outbreak ([https://github.com/weinbergerlab/excess\\_pi\\_covid](https://github.com/weinbergerlab/excess_pi_covid)).<sup>12</sup> Final data were  
87 obtained August 15, 2020. Positive tests and the overall number of tests in each state  
88 were collected from the website of The COVID Tracking Project  
89 (<https://covidtracking.com/>). Population data were taken from the United States Census

90 Bureau's 2019 estimates. R (R: A language and environment for statistical computing,  
91 version 3.6.1. R Foundation for Statistical Computing, Vienna, Austria, [https://www.R-](https://www.R-project.org/)  
92 [project.org/.](https://www.R-project.org/)) was used for statistical analyses.

93

## 94 Results

95

### 96 *State Testing Guidelines*

97 From March to July 2020, recommendations of COVID-19 testing for the general public  
98 varied between states and over time (Figure 1), as did testing prioritization for identified  
99 risk groups (Supplemental Figure 1).

100

101 The earliest-available state-level data ranged from March 1 (in Michigan, Rhode Island,  
102 and Washington) to March 12 (in Massachusetts), while the remaining 47 states began  
103 reporting COVID-19 data between March 4 and March 7. March data included all March  
104 dates – April 4; April data included April 5 – May 2; May data included May 3 – June 6;  
105 June data included June 7 – July 4; July data included records from July 5 – 31.

106

107 As of July, 16 states recommended that asymptomatic members of the general public  
108 be tested for COVID-19. 9 states actively recommended against the testing of  
109 asymptomatic people; 3 of which then reversed this recommendation in July. South  
110 Dakota also recommended against seeking a test if people were experiencing  
111 symptoms, citing the lack of effective COVID-19 therapy as a contraindication for  
112 testing. Most states (35/51) changed their testing recommendations twice between

113 March and July. Only Oklahoma did not change their testing criteria, though the state  
114 health department website specifies that private testing facilities have their own criteria.

115

#### 116 *Factors associated with higher rates of testing*

117 Reported COVID-19 tests *per capita* increased steadily, though unevenly, from March to  
118 June, while the percentage of positive tests varied widely between states (Figure 2, 3).

119 States with more permissive testing recommendations had a lower percentage of  
120 positive tests (rho -0.22, 95% CI -0.34, -0.11), reflecting the inclusion of lower risk  
121 individuals in the testing pool. The minimum percentage of positive tests for a single  
122 month was 0.8% in May in Alaska; the maximum was 47% in April in New Jersey. In a  
123 multivariate model, both more inclusive testing recommendations and higher epidemic  
124 intensity were associated with higher rates of testing.

125

#### 126 *Testing intensity and completeness of death reporting*

127 The completeness of recording deaths as due to COVID-19 was related to the rate of  
128 testing. (Figure 4). This was particularly true in the first months of the  
129 pandemic when testing levels were low relative to the intensity of the epidemic; in later  
130 months, the level of testing was high and had little influence on the difference between  
131 reported COVID-19 deaths and excess PIC deaths.

132

#### 133 Discussion

134

135 In order to obtain accurate statistics on the COVID-19 pandemic, viral testing needs to  
136 scale with epidemic intensity. Particularly in the early months of the pandemic,  
137 restrictive state-level testing recommendations and difficulties in accessing tests  
138 resulted in inadequate testing levels.<sup>5</sup> This was manifest in higher viral positivity rates  
139 and greater differences between reported COVID-19 deaths and excess PIC deaths.  
140 From March-May, testing per capita and completeness of mortality data both increased,  
141 though afterwards this apparent relationship became less clear. It is possible that other  
142 characteristics of healthcare systems in each state influenced both the testing rates and  
143 completeness of death reporting (i.e. supply chain or personnel issues). The variation in  
144 data completeness seen in July may be due to reporting delays, and thus might  
145 decrease as mortality data are updated. Expanded access to testing can play a critical  
146 role in obtaining an accurate picture of the progression of the epidemic.

147

148 This study has certain limitations. Changes in completeness of death reporting could be  
149 influenced by other factors that might also vary over time, such as state-level guidelines  
150 for coding deaths as due to COVID-19. The viral testing criteria established by state  
151 health departments are sometimes superseded by local governments or private clinics.<sup>9</sup>  
152 The testing data counts tests, not individuals, so people tested multiple times will be  
153 included multiple times.

154

155 Conclusions

156

157 The patchwork of state-level testing guidelines is associated with local variations in  
158 testing intensity, and these variations have consequences for the completeness of data  
159 on key indicators of the severity and progression of the pandemic. More coordinated  
160 national guidance could strengthen the pandemic tracking and response.

161

162 List of Abbreviations

163

164 PIC: pneumonia + influenza + COVID-19

165 CI: confidence interval

166

167 Declarations

168

169 **Ethics approval and consent to participate:** Not applicable

170 **Consent for publication:** Not applicable

171 **Availability of data and materials:** The datasets generated and/or analysed during the  
172 current study are available in the COVID Tracking Project repository  
173 (<https://covidtracking.com/>), the excess PIC mortality repository  
174 ([https://github.com/weinbergerlab/excess\\_pi\\_covid](https://github.com/weinbergerlab/excess_pi_covid)), and on the websites of the state  
175 health departments (all of which appear in Supplemental Table 1).

176 **Competing interests:** SRP has received travel fees from Pfizer unrelated to this  
177 manuscript. DMW has received consulting fees from Pfizer, Merck, GSK, and Affinivax  
178 for work unrelated to this manuscript and is Principal Investigator on a grant from Pfizer  
179 to Yale University on a project unrelated to this manuscript



180 **Funding:** SP was supported by a NIH T32 training grant, award number  
181 2T32AI007210-36A1 (MPI).

182 **Authors' contributions:** SP conceived of the study, extracted the data, ran the  
183 analyses, and wrote the first draft of the paper. DMW contributed to the design of the  
184 study and revisions of the manuscript and plotting.

185 **Acknowledgements:** We would like to thank the state health departments in the United  
186 States and the District of Columbia and the COVID Tracking Project for providing data  
187 used for these analyses.

188 **Authors' information:** [stephanie.perniciaro@yale.edu](mailto:stephanie.perniciaro@yale.edu)

189

## 190 References

- 191 1. WHO Director-General's opening remarks at the media briefing on COVID-19 - 11  
192 March 2020. [https://www.who.int/dg/speeches/detail/who-director-general-s-](https://www.who.int/dg/speeches/detail/who-director-general-s-opening-remarks-at-the-media-briefing-on-covid-19---11-march-2020)  
193 [opening-remarks-at-the-media-briefing-on-covid-19---11-march-2020](https://www.who.int/dg/speeches/detail/who-director-general-s-opening-remarks-at-the-media-briefing-on-covid-19---11-march-2020).
- 194 2. Schuchat, A. Public Health Response to the Initiation and Spread of Pandemic  
195 COVID-19 in the United States, February 24–April 21, 2020. *MMWR Morb. Mortal.*  
196 *Wkly. Rep.* **69**, (2020).
- 197 3. Haffajee, R. L. & Mello, M. M. Thinking Globally, Acting Locally — The U.S.  
198 Response to Covid-19. *N. Engl. J. Med.* **382**, e75 (2020).
- 199 4. US Historical Data. *The COVID Tracking Project*  
200 <https://covidtracking.com/data/national>.
- 201 5. Shear, M. D. *et al.* The Lost Month: How a Failure to Test Blinded the U.S. to Covid-  
202 19. *The New York Times* (2020).

- 203 6. CNN, P. L. Hogan: Maryland protected coronavirus tests it secured from South  
204 Korea 'like Fort Knox'. *CNN* [https://www.cnn.com/2020/04/30/politics/larry-hogan-](https://www.cnn.com/2020/04/30/politics/larry-hogan-coronavirus-masks-national-guard/index.html)  
205 [coronavirus-masks-national-guard/index.html](https://www.cnn.com/2020/04/30/politics/larry-hogan-coronavirus-masks-national-guard/index.html).
- 206 7. Walsh, J. D. How Reliable Are COVID-19 Tests? *Intelligencer*  
207 <https://nymag.com/intelligencer/2020/06/how-accurate-are-covid-19-tests.html>  
208 (2020).
- 209 8. Remarks by President Trump After Tour of the Centers for Disease Control and  
210 Prevention | Atlanta, GA. *The White House* [https://www.whitehouse.gov/briefings-](https://www.whitehouse.gov/briefings-statements/remarks-president-trump-tour-centers-disease-control-prevention-atlanta-ga/)  
211 [statements/remarks-president-trump-tour-centers-disease-control-prevention-](https://www.whitehouse.gov/briefings-statements/remarks-president-trump-tour-centers-disease-control-prevention-atlanta-ga/)  
212 [atlanta-ga/](https://www.whitehouse.gov/briefings-statements/remarks-president-trump-tour-centers-disease-control-prevention-atlanta-ga/).
- 213 9. Georgia Governor And The Mayor Of Atlanta In Turf War Over COVID-19  
214 Restrictions. *NPR.org* [https://www.npr.org/sections/coronavirus-live-](https://www.npr.org/sections/coronavirus-live-updates/2020/07/10/889930319/georgia-governor-and-the-mayor-of-atlanta-in-turf-war-over-covid-19-restrictions)  
215 [updates/2020/07/10/889930319/georgia-governor-and-the-mayor-of-atlanta-in-turf-](https://www.npr.org/sections/coronavirus-live-updates/2020/07/10/889930319/georgia-governor-and-the-mayor-of-atlanta-in-turf-war-over-covid-19-restrictions)  
216 [war-over-covid-19-restrictions](https://www.npr.org/sections/coronavirus-live-updates/2020/07/10/889930319/georgia-governor-and-the-mayor-of-atlanta-in-turf-war-over-covid-19-restrictions).
- 217 10. 'It's Like Having No Testing': Coronavirus Test Results Are Still Delayed - The New  
218 York Times. <https://www.nytimes.com/2020/08/04/us/virus-testing-delays.html>.
- 219 11. HaddenKristie *et al.* Addressing Homelessness and Covid-19 Quarantine: A  
220 Streamlined Assessment and Referral Process. *NEJM Catal. Innov. Care Deliv.*  
221 (2020).
- 222 12. Weinberger, D. M. *et al.* Estimation of Excess Deaths Associated With the COVID-  
223 19 Pandemic in the United States, March to May 2020. *JAMA Intern. Med.* (2020)  
224 doi:10.1001/jamainternmed.2020.3391.

225

226

227 Supplementary Materials

228

229 Supplemental Table 1. State health department websites, used as the source to  
230 determine state-level COVID-19 testing guidelines.

231

| State | Source(s)                                                                                                                                                                                                                                                                                                                                                               |
|-------|-------------------------------------------------------------------------------------------------------------------------------------------------------------------------------------------------------------------------------------------------------------------------------------------------------------------------------------------------------------------------|
| AL    | <a href="https://www.alabamapublichealth.gov/covid19/patients.html">https://www.alabamapublichealth.gov/covid19/patients.html</a>                                                                                                                                                                                                                                       |
| AK    | <a href="http://dhss.alaska.gov/dph/Epi/id/SiteAssets/Pages/HumanCoV/AKCOVIDTestingGuidance.pdf">http://dhss.alaska.gov/dph/Epi/id/SiteAssets/Pages/HumanCoV/AKCOVIDTestingGuidance.pdf</a>                                                                                                                                                                             |
| AZ    | <a href="https://www.azdhs.gov/documents/preparedness/epidemiology-disease-control/infectious-diseases-services/coronavirus/arizona-state-public-health-laboratory-testing-matrix.pdf">https://www.azdhs.gov/documents/preparedness/epidemiology-disease-control/infectious-diseases-services/coronavirus/arizona-state-public-health-laboratory-testing-matrix.pdf</a> |
| AR    | <a href="https://www.healthy.arkansas.gov/programs-services/topics/covid-19-guidance-for-getting-tested">https://www.healthy.arkansas.gov/programs-services/topics/covid-19-guidance-for-getting-tested</a>                                                                                                                                                             |
| CA    | <a href="https://www.cdph.ca.gov/Programs/CID/DCDC/Pages/COVID-19/Expanding-Access-to-Testing-Updated-Interim-Guidance-on-Prioritization-for-COVID-19-Laboratory-Testing-0501.aspx">https://www.cdph.ca.gov/Programs/CID/DCDC/Pages/COVID-19/Expanding-Access-to-Testing-Updated-Interim-Guidance-on-Prioritization-for-COVID-19-Laboratory-Testing-0501.aspx</a>       |
| CO    | <a href="https://covid19.colorado.gov/covid-19-in-colorado/about-covid-19/testing-for-covid-19">https://covid19.colorado.gov/covid-19-in-colorado/about-covid-19/testing-for-covid-19</a>                                                                                                                                                                               |
| CT    | <a href="https://portal.ct.gov/Coronavirus/Covid-19-Knowledge-Base/COVID-19-Testing">https://portal.ct.gov/Coronavirus/Covid-19-Knowledge-Base/COVID-19-Testing</a>                                                                                                                                                                                                     |
| DE    | <a href="https://coronavirus.delaware.gov/testing/testing-frequently-asked-questions/">https://coronavirus.delaware.gov/testing/testing-frequently-asked-questions/</a>                                                                                                                                                                                                 |
| DC    | <a href="https://coronavirus.dc.gov/testing">https://coronavirus.dc.gov/testing</a>                                                                                                                                                                                                                                                                                     |
| FL    | <a href="https://floridahealthcovid19.gov/health-care-providers/">https://floridahealthcovid19.gov/health-care-providers/</a>                                                                                                                                                                                                                                           |
| GA    | <a href="https://dph.georgia.gov/covid-19-testingdirect-patient-lines">https://dph.georgia.gov/covid-19-testingdirect-patient-lines</a>                                                                                                                                                                                                                                 |
| HI    | <a href="https://health.hawaii.gov/coronavirusdisease2019/for-clinicians/evaluating-puis/">https://health.hawaii.gov/coronavirusdisease2019/for-clinicians/evaluating-puis/</a>                                                                                                                                                                                         |
| ID    | <a href="https://rebound.idaho.gov/wp-content/uploads/testing-recommendations.pdf">https://rebound.idaho.gov/wp-content/uploads/testing-recommendations.pdf</a>                                                                                                                                                                                                         |

|    |                                                                                                                                                                                                                                                                 |                                                                                                                                                                                                                                                                   |
|----|-----------------------------------------------------------------------------------------------------------------------------------------------------------------------------------------------------------------------------------------------------------------|-------------------------------------------------------------------------------------------------------------------------------------------------------------------------------------------------------------------------------------------------------------------|
| IL | <a href="https://www.dph.illinois.gov/topics-services/diseases-and-conditions/diseases-a-z-list/coronavirus/health-care-providers">https://www.dph.illinois.gov/topics-services/diseases-and-conditions/diseases-a-z-list/coronavirus/health-care-providers</a> |                                                                                                                                                                                                                                                                   |
| IN | <a href="https://www.coronavirus.in.gov/files/IN-COVID-19_FAQforPublic%207.3.20.pdf">https://www.coronavirus.in.gov/files/IN-COVID-19_FAQforPublic%207.3.20.pdf</a>                                                                                             | <a href="https://www.coronavirus.in.gov/files/IN-COVID-19_FAQforPublic%206.13.20.pdf">https://www.coronavirus.in.gov/files/IN-COVID-19_FAQforPublic%206.13.20.pdf</a>                                                                                             |
| IA | <a href="https://covidtesting.shl.uiowa.edu/">https://covidtesting.shl.uiowa.edu/</a>                                                                                                                                                                           |                                                                                                                                                                                                                                                                   |
| KS | <a href="https://www.coronavirus.kdheks.gov/DocumentCenter/View/393/COVID-19-Testing-Approval-Form-fillable-PDF---4-21-20">https://www.coronavirus.kdheks.gov/DocumentCenter/View/393/COVID-19-Testing-Approval-Form-fillable-PDF---4-21-20</a>                 |                                                                                                                                                                                                                                                                   |
| KY | <a href="https://chfs.ky.gov/Pages/search.aspx?terms=covid+test&amp;affiliateId=CHFS">https://chfs.ky.gov/Pages/search.aspx?terms=covid+test&amp;affiliateId=CHFS</a>                                                                                           | <a href="https://chfs.ky.gov/agencies/dph/covid19/guidance-tohealthcareprovidersregardingCOVID19statelaboratorytesting03102020.pdf">https://chfs.ky.gov/agencies/dph/covid19/guidance-tohealthcareprovidersregardingCOVID19statelaboratorytesting03102020.pdf</a> |
| LA | <a href="http://ldh.la.gov/assets/oph/Coronavirus/resources/TestingIsolationGuidelines.pdf">http://ldh.la.gov/assets/oph/Coronavirus/resources/TestingIsolationGuidelines.pdf</a>                                                                               |                                                                                                                                                                                                                                                                   |
| ME | <a href="https://www.maine.gov/tools/whatsnew/index.php?topic=DHS+Press+Releases&amp;id=2657874&amp;v=dhhs_article_2020">https://www.maine.gov/tools/whatsnew/index.php?topic=DHS+Press+Releases&amp;id=2657874&amp;v=dhhs_article_2020</a>                     |                                                                                                                                                                                                                                                                   |
| MD | <a href="https://phpa.health.maryland.gov/Documents/coronavirus_testing_FAQ.pdf">https://phpa.health.maryland.gov/Documents/coronavirus_testing_FAQ.pdf</a>                                                                                                     |                                                                                                                                                                                                                                                                   |
| MA | <a href="https://www.mass.gov/info-details/about-covid-19-testing#should-i-be-tested?">https://www.mass.gov/info-details/about-covid-19-testing#should-i-be-tested?-</a>                                                                                        |                                                                                                                                                                                                                                                                   |
| MI | <a href="https://www.michigan.gov/coronavirus/0,9753,7-406-98163-530157--,00.html">https://www.michigan.gov/coronavirus/0,9753,7-406-98163-530157--,00.html</a>                                                                                                 |                                                                                                                                                                                                                                                                   |
| MN | <a href="https://www.health.state.mn.us/diseases/coronavirus/symptoms.html#test">https://www.health.state.mn.us/diseases/coronavirus/symptoms.html#test</a>                                                                                                     |                                                                                                                                                                                                                                                                   |
| MS | <a href="https://msdh.ms.gov/msdhsite/_static/14,21866,420.html">https://msdh.ms.gov/msdhsite/_static/14,21866,420.html</a>                                                                                                                                     |                                                                                                                                                                                                                                                                   |
| MO | <a href="https://health.mo.gov/emergencies/ert/alerts/advisories/pdf/update42220.pdf">https://health.mo.gov/emergencies/ert/alerts/advisories/pdf/update42220.pdf</a>                                                                                           |                                                                                                                                                                                                                                                                   |
| MT | <a href="https://dphhs.mt.gov/publichealth/cdepi/diseases/coronavirusmt">https://dphhs.mt.gov/publichealth/cdepi/diseases/coronavirusmt</a>                                                                                                                     |                                                                                                                                                                                                                                                                   |
| NE | <a href="http://dhhs.ne.gov/Documents/COVID-19%20Guidance%20to%20Public%20and%20Testing.pdf">http://dhhs.ne.gov/Documents/COVID-19%20Guidance%20to%20Public%20and%20Testing.pdf</a>                                                                             | <a href="https://covid19testingne.co1.qualtrics.com/jfe/form/SV_cJa8ezYYRQfZRCI">https://covid19testingne.co1.qualtrics.com/jfe/form/SV_cJa8ezYYRQfZRCI</a>                                                                                                       |

|    |                                                                                                                                                                                                                                                                                 |
|----|---------------------------------------------------------------------------------------------------------------------------------------------------------------------------------------------------------------------------------------------------------------------------------|
| NV | <a href="https://nvhealthresponse.nv.gov/find-covid-19-testing-in-nevada/">https://nvhealthresponse.nv.gov/find-covid-19-testing-in-nevada/</a>                                                                                                                                 |
| NH | <a href="https://business.nh.gov/DOS_COVID19Testing/">https://business.nh.gov/DOS_COVID19Testing/</a>                                                                                                                                                                           |
| NJ | <a href="https://covid19.nj.gov/pages/testing">https://covid19.nj.gov/pages/testing</a>                                                                                                                                                                                         |
| NM | <a href="https://cv.nmhealth.org/public-health-screening-and-testing/location-details/">https://cv.nmhealth.org/public-health-screening-and-testing/location-details/</a>                                                                                                       |
| NY | <a href="https://coronavirus.health.ny.gov/covid-19-testing">https://coronavirus.health.ny.gov/covid-19-testing</a>                                                                                                                                                             |
| NC | <a href="https://covid19.ncdhhs.gov/about-covid-19/testing">https://covid19.ncdhhs.gov/about-covid-19/testing</a>                                                                                                                                                               |
| ND | <a href="https://www.health.nd.gov/sites/www/files/documents/Files/MSS/coronavirus/2020_6_16_COVID_PCR_Guidance.pdf">https://www.health.nd.gov/sites/www/files/documents/Files/MSS/coronavirus/2020_6_16_COVID_PCR_Guidance.pdf</a>                                             |
| OH | <a href="https://coronavirus.ohio.gov/wps/portal/gov/covid-19/families-and-individuals/MHSE/">https://coronavirus.ohio.gov/wps/portal/gov/covid-19/families-and-individuals/MHSE/</a>                                                                                           |
| OK | <a href="https://coronavirus.health.ok.gov/articles/criteria-guide-evaluation-and-laboratory-testing-covid-19-clinicians-and-laboratories">https://coronavirus.health.ok.gov/articles/criteria-guide-evaluation-and-laboratory-testing-covid-19-clinicians-and-laboratories</a> |
| OR | <a href="https://sharesystems.dhsoha.state.or.us/DHSForms/Served/le2267.pdf">https://sharesystems.dhsoha.state.or.us/DHSForms/Served/le2267.pdf</a>                                                                                                                             |
| PA | <a href="https://www.health.pa.gov/topics/disease/coronavirus/Pages/Guidance/Testing-Factsheet.aspx">https://www.health.pa.gov/topics/disease/coronavirus/Pages/Guidance/Testing-Factsheet.aspx</a>                                                                             |
| RI | <a href="https://health.ri.gov/covid/testing/">https://health.ri.gov/covid/testing/</a>                                                                                                                                                                                         |
| SC | <a href="https://www.scdhec.gov/sites/default/files/media/document/10466-DHU-06-19-2020-COVID-19.pdf">https://www.scdhec.gov/sites/default/files/media/document/10466-DHU-06-19-2020-COVID-19.pdf</a>                                                                           |
| SD | <a href="https://doh.sd.gov/documents/COVID19/COVID_TestingFacts.pdf">https://doh.sd.gov/documents/COVID19/COVID_TestingFacts.pdf</a>                                                                                                                                           |
| TN | <a href="https://www.tn.gov/governor/covid-19/get-tested.html">https://www.tn.gov/governor/covid-19/get-tested.html</a>                                                                                                                                                         |
| TX | <a href="https://dshs.texas.gov/coronavirus/public-health.aspx">https://dshs.texas.gov/coronavirus/public-health.aspx</a>                                                                                                                                                       |
| UT | <a href="https://coronavirus-download.utah.gov/Health/UDOH%20HAN%20COVID_04142020_Statewide_Guidance%20(1).pdf">https://coronavirus-download.utah.gov/Health/UDOH%20HAN%20COVID_04142020_Statewide_Guidance%20(1).pdf</a>                                                       |
| VT | <a href="https://www.healthvermont.gov/response/coronavirus-covid-19/testing-covid-19">https://www.healthvermont.gov/response/coronavirus-covid-19/testing-covid-19</a>                                                                                                         |

|    |                                                                                                                                                                                                                                       |                                                                                                                                                                                                                                               |
|----|---------------------------------------------------------------------------------------------------------------------------------------------------------------------------------------------------------------------------------------|-----------------------------------------------------------------------------------------------------------------------------------------------------------------------------------------------------------------------------------------------|
| VA | <a href="https://www.vdh.virginia.gov/coronavirus/health-professionals/vdh-updated-guidance-on-testing-for-covid-19/">https://www.vdh.virginia.gov/coronavirus/health-professionals/vdh-updated-guidance-on-testing-for-covid-19/</a> |                                                                                                                                                                                                                                               |
| WA | <a href="https://www.doh.wa.gov/Emergencies/NovelCoronavirusOutbreak2020COVID19/TestingforCOVID19">https://www.doh.wa.gov/Emergencies/NovelCoronavirusOutbreak2020COVID19/TestingforCOVID19</a>                                       | <a href="https://www.doh.wa.gov/Portals/1/Documents/1600/coronavirus/Interim-2019NovelCoronavirusQuicksheetProviders.pdf">https://www.doh.wa.gov/Portals/1/Documents/1600/coronavirus/Interim-2019NovelCoronavirusQuicksheetProviders.pdf</a> |
| WV | <a href="https://dhhr.wv.gov/COVID-19/pages/testing.aspx">https://dhhr.wv.gov/COVID-19/pages/testing.aspx</a>                                                                                                                         |                                                                                                                                                                                                                                               |
| WI | <a href="https://www.dhs.wisconsin.gov/covid-19/testing.htm">https://www.dhs.wisconsin.gov/covid-19/testing.htm</a>                                                                                                                   |                                                                                                                                                                                                                                               |
| WY | <a href="https://health.wyo.gov/department-offers-testing-update-advice-for-wyoming/">https://health.wyo.gov/department-offers-testing-update-advice-for-wyoming/</a>                                                                 |                                                                                                                                                                                                                                               |

232

233

Figure 1. COVID-19 testing guidelines by state. Testing recommendations for the general public was scaled as follows: 0 = criterion not included, 1 = negative influenza test required, 2 = all symptomatic people, 3 = all people, including asymptomatic people. Testing guidelines for special risk groups are shown in Supplemental Figure 1.

|    | Mar | Apr | May | Jun | Jul |    | Mar | Apr | May | Jun | Jul |
|----|-----|-----|-----|-----|-----|----|-----|-----|-----|-----|-----|
| AL | 2   | 0   | 0   | 0   | 0   | MO | 0   | 0   | 0   | 0   | 3   |
| AK | 2   | 2   | 2   | 2   | 2   | MT | 2   | 0   | 2   | 2   | 2   |
| AZ | 0   | 0   | 2   | 0   | 0   | NE | 0   | 0   | 2   | 2   | 3   |
| AR | 2   | 2   | 2   | 2   | 2   | NV | 0   | 0   | 3   | 3   | 3   |
| CA | 2   | 2   | 3   | 2   | 2   | NH | 0   | 0   | 3   | 3   | 3   |
| CO | 2   | 2   | 2   | 2   | 2   | NJ | 2   | 0   | 2   | 3   | 3   |
| CT | 0   | 2   | 2   | 2   | 2   | NM | 2   | 2   | 2   | 3   | 3   |
| DE | 0   | 2   | 2   | 3   | 3   | NY | 1   | 1   | 2   | 3   | 3   |
| DC | 0   | 2   | 2   | 2   | 2   | NC | 1   | 1   | 2   | 2   | 2   |
| FL | 0   | 2   | 2   | 2   | 2   | ND | 0   | 2   | 2   | 2   | 2   |
| GA | 0   | 2   | 3   | 3   | 3   | OH | 0   | 0   | 0   | 0   | 3   |
| HI | 0   | 0   | 0   | 2   | 2   | OK | 0   | 0   | 0   | 0   | 0   |
| ID | 2   | 0   | 2   | 2   | 2   | OR | 0   | 2   | 2   | 2   | 2   |
| IL | 0   | 0   | 0   | 0   | 0   | PA | 0   | 2   | 2   | 2   | 3   |
| IN | 0   | 0   | 0   | 0   | 3   | RI | 0   | 2   | 2   | 2   | 2   |
| IA | 0   | 0   | 0   | 0   | 0   | SC | 0   | 1   | 2   | 2   | 2   |
| KS | 1   | 0   | 0   | 0   | 0   | SD | 0   | 0   | 0   | 0   | 0   |
| KY | 2   | 0   | 0   | 0   | 0   | TN | 0   | 2   | 3   | 3   | 3   |
| LA | 1   | 2   | 2   | 2   | 2   | TX | 0   | 2   | 2   | 2   | 2   |
| ME | 2   | 0   | 0   | 2   | 2   | UT | 0   | 2   | 2   | 2   | 2   |
| MD | 2   | 0   | 2   | 2   | 3   | VT | 2   | 2   | 3   | 3   | 3   |
| MA | 0   | 0   | 0   | 2   | 2   | VA | 1   | 2   | 2   | 2   | 2   |
| MI | 0   | 0   | 2   | 2   | 2   | WA | 0   | 2   | 2   | 2   | 2   |
| MN | 0   | 0   | 2   | 2   | 2   | WV | 1   | 2   | 3   | 3   | 3   |
| MS | 2   | 0   | 2   | 2   | 2   | WI | 0   | 0   | 2   | 2   | 2   |
|    |     |     |     |     |     | WY | 1   | 0   | 2   | 2   | 2   |



Figure 2. COVID-19 tests per 1000 population in the United States (A), and the percentage of positive COVID-19 tests (B), March-July 2020. Each state has a line; colors of lines are determined by geographic region per the inserted map.

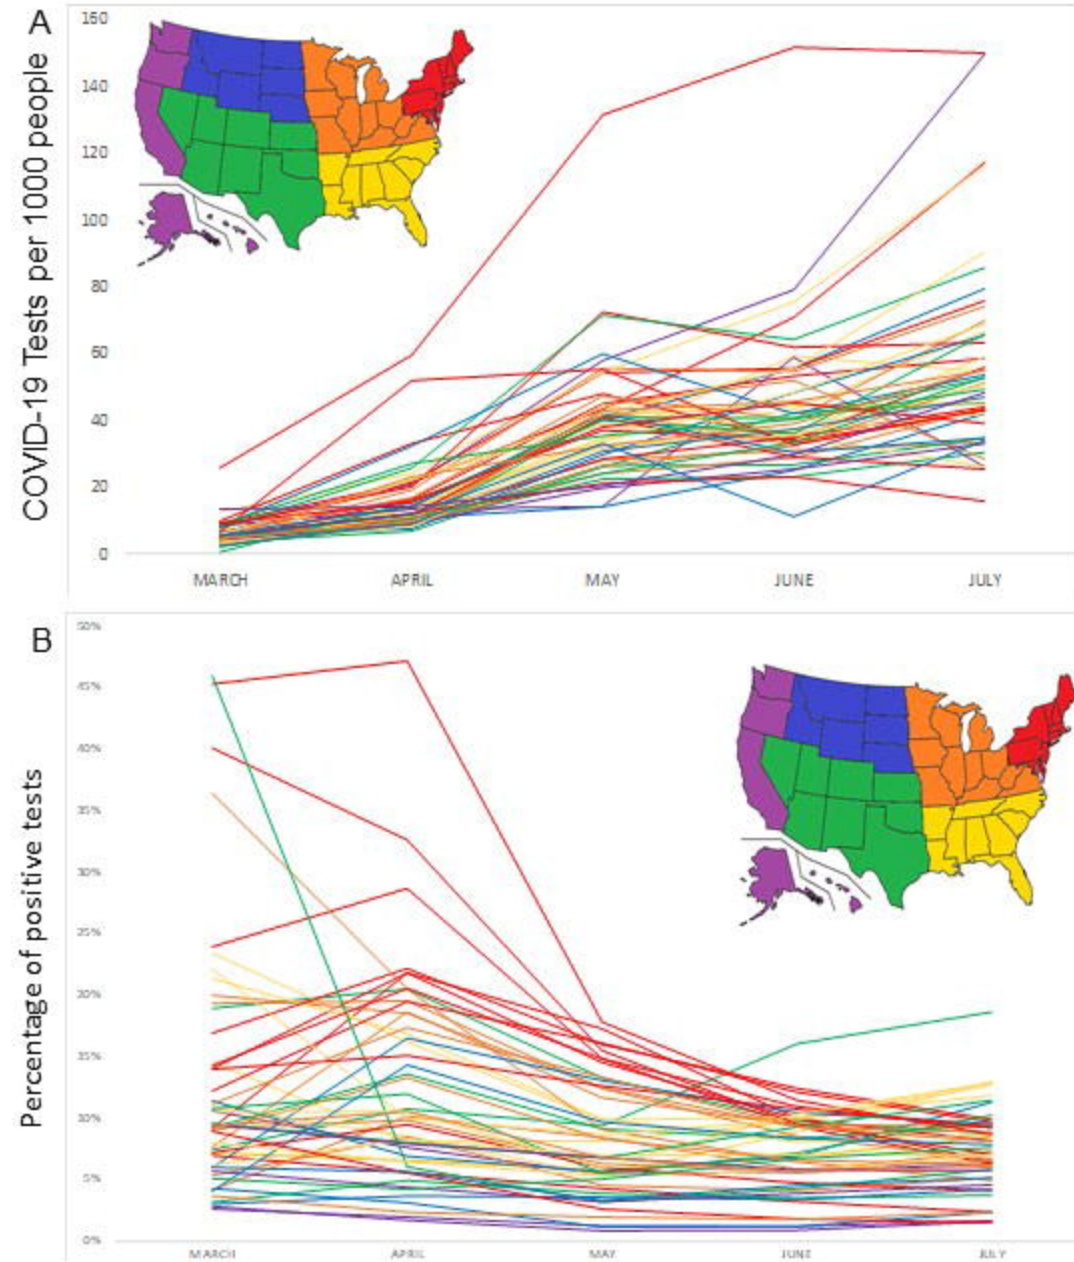



Figure 3. COVID-19 testing recommendation scores (A) and COVID-19 tests per 1000 people (B) from March-July, 2020 in the United States

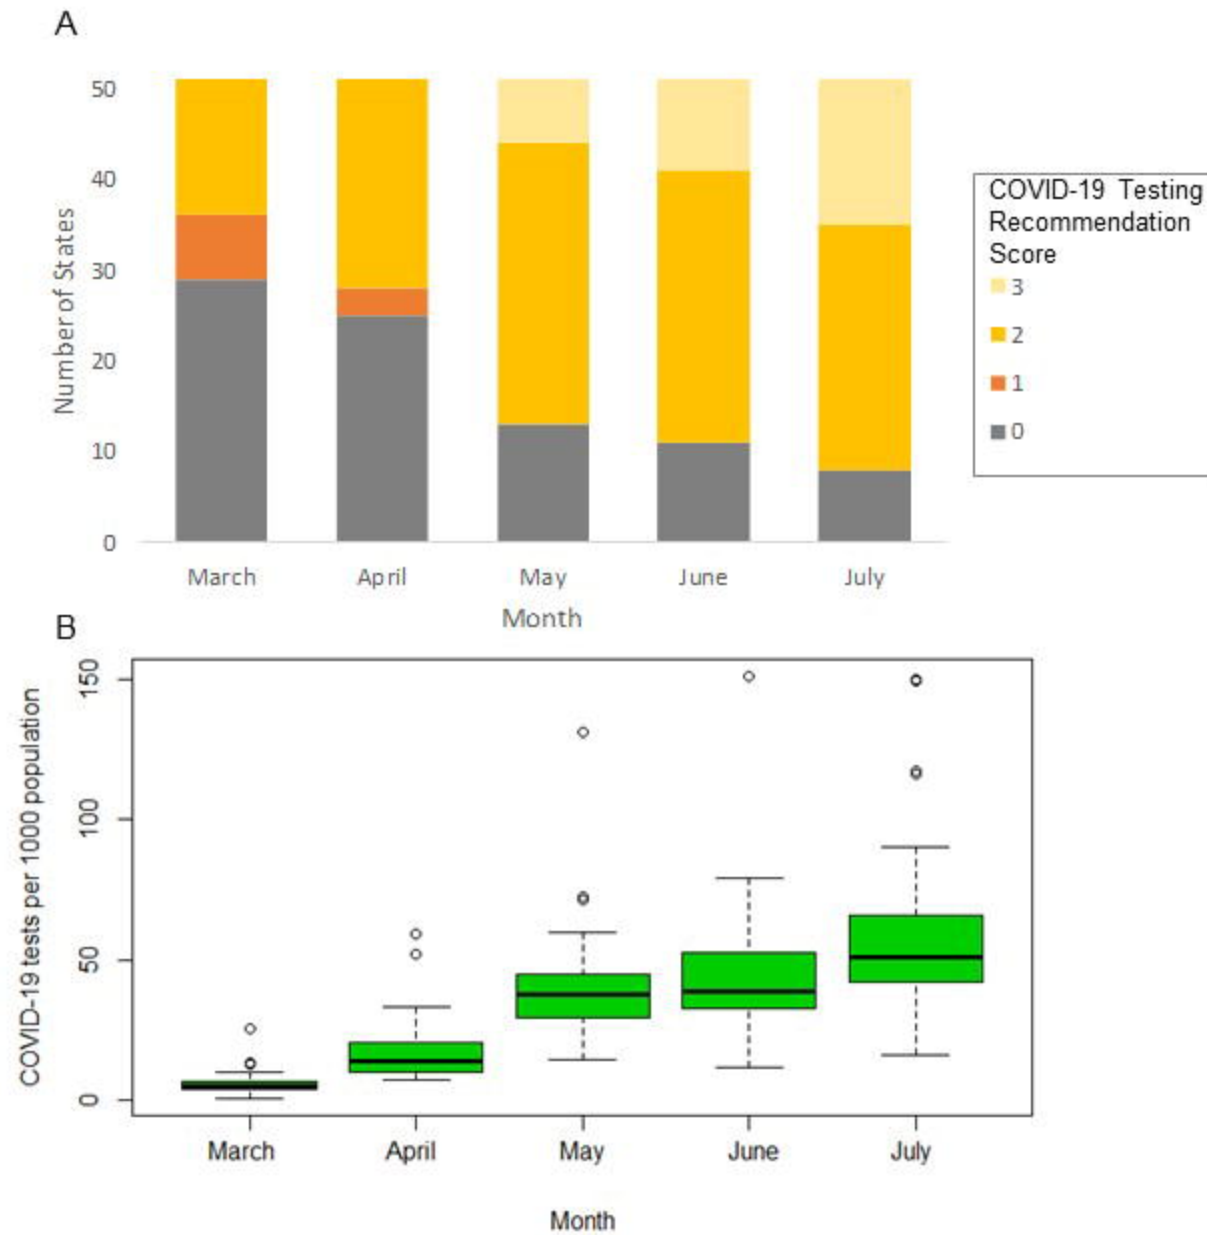

Figure 4. Association between the rate of testing for SARS-CoV-2 (*per capita*) and the completeness of death reporting, as measured by the ratio between reported COVID-19 deaths and excess deaths due to pneumonia/influenza/coronavirus (PIC). The line +/- 95% confidence intervals represents the trend as estimated from a generalized additive model. The size of the circles is proportional to the number of excess deaths due to PIC in each state. The color depicts the month (March-July)—earlier months are darker colors, later months are lighter.

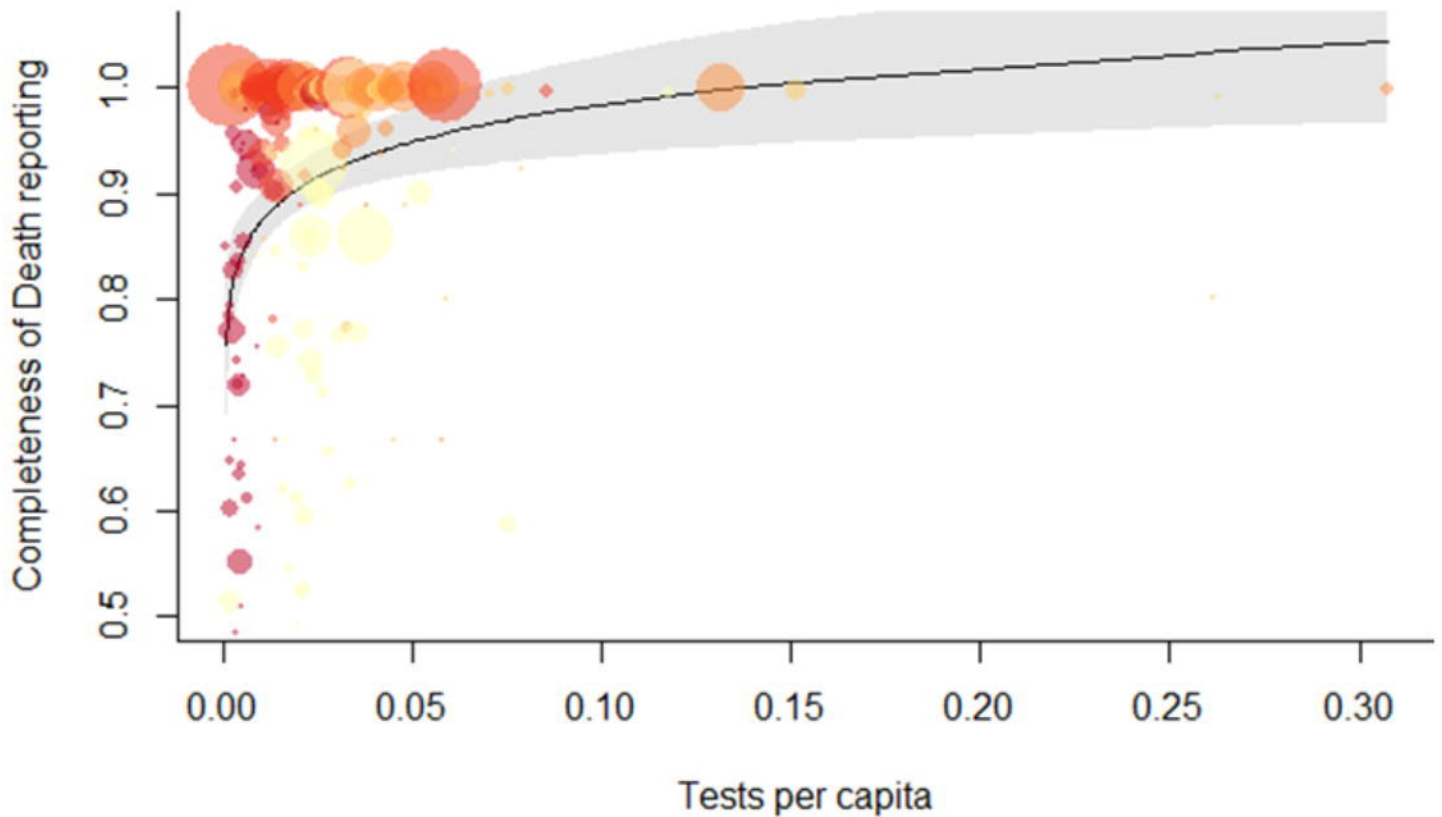

Source: https://medrxiv.org/content/10.1101/2020.09.04.20188326v2.full.pdf
